# Supplementary material for: TMTC4 is a hair cell–specific human deafness gene
Source: JCI journal article supplement (doi:10.1172/jci.insight.172665), 2023-11-14

A

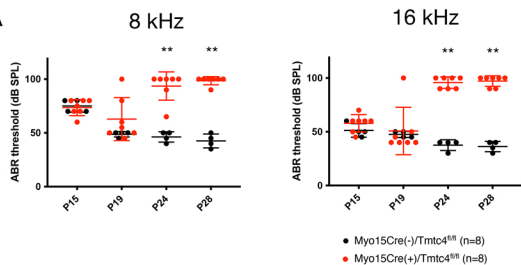

B

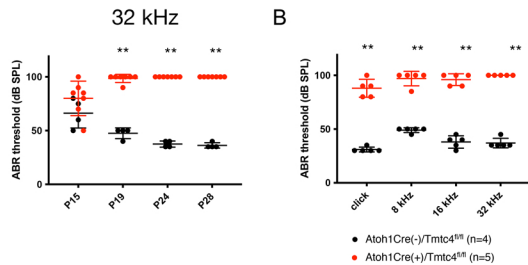

C

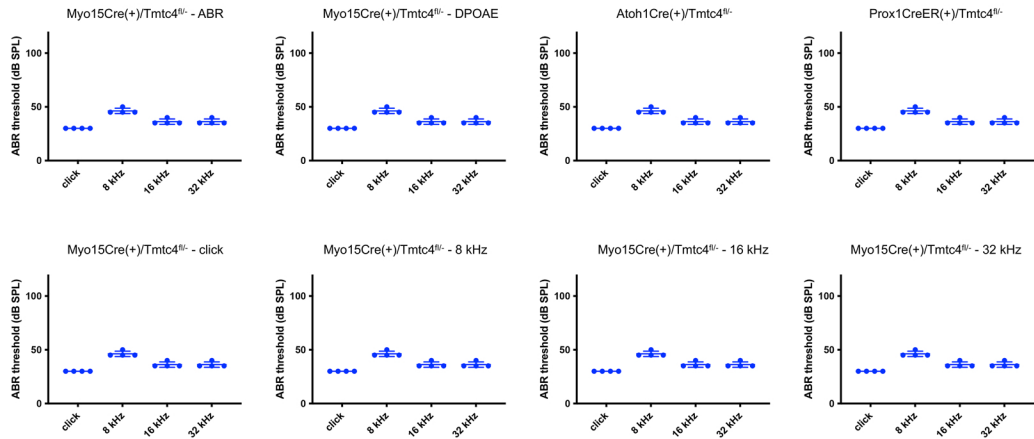

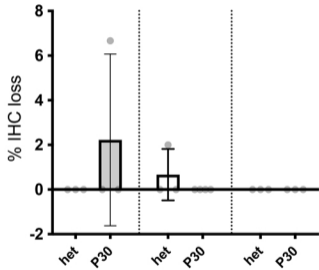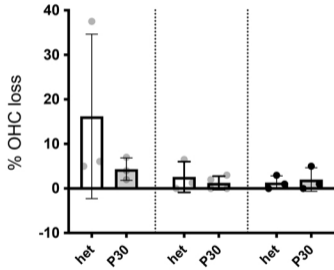

Supplement: sd1 [file 1]
